# Supplementary material for: Transcriptome sequencing of olfactory-related genes in olfactory transduction of large yellow croaker (Larimichthy crocea) in response to bile salts
Source: PeerJ. 2019 Mar 20;7:e6627. doi: 10.7717/peerj.6627 (PMC6431138; doi:10.7717/peerj.6627)
Supplement: Dataset S1 [file peerj-07-6627-s001.xlsx]

## Sheet: Sheet1
concentration of SAS	feeding response	movement response
control（0）	5	15
	6	20
	7	14
0.2
	12	35
	8	26
	9	42
0.3
	18	61
	17	64
	18	68
0.4
	15	45
	10	52
	11	48
0.5
	13	45
	12	39
	11	44
